# Supplementary material
Source: PubMed Central journal article supplement (PMC4482792)
Supplement: NIHMS689493-supplement-Legacy_Supplemental_File.pdf [file NIHMS689493-supplement-Legacy_Supplemental_File.pdf]

## **Materials and Methods**

1  
2  
3 All studies were approved by the Institutional Animal Care and Use Committee at the  
4 University of Iowa (PHS Animal Welfare Assurance #A3021-01).

5 *Experimental strategy.* *Egfr*<sup>Wa2/+</sup> (Control) and littermate *Egfr*<sup>Wa2/Wa2</sup> (Wave) mice bred on  
6 a C57/BL6 background were maintained on normal chow diet (Harlan Teklad 7004 Rodent  
7 Diet). Echocardiograms were performed on surviving mice at 1.5, 6, and 12 months of age.  
8 Cardiac magnetic resonance imaging (MRI) was performed on a subset of mice from each  
9 group at 6 months of age. Cardiac catheterization was performed on subsets of mice from each  
10 group at 6 or 12 months of age. Following completion of imaging and catheterization studies,  
11 mice were euthanized (pentobarbital, 150 mg/kg intraperitoneal injection), at age 1.5, 6, or 12  
12 months, and tissue was collected for subsequent histological analysis.

13 *Pharmacologic intervention.* In a previous study, we found that administration of the  
14 PPAR- $\gamma$  agonist pioglitazone attenuated aortic valve calcification and protected aortic valve  
15 function in hypercholesterolemic mice.<sup>1</sup> We hypothesized that pioglitazone would attenuate  
16 aortic valve calcification and protect valve function in normocholesterolemic Wave mice.  
17 Therefore, 16 mice (7 Control and 9 Wave mice) were treated with pioglitazone (20 mg/kg per  
18 day in chow) from 1 to 6 months of age, then euthanized.

19 *Echocardiography.* Midazolam (0.15 mg, subcutaneous) was used to produce light  
20 conscious sedation. Parasternal long- and short-axis views were obtained using high-frequency  
21 echocardiography (Vevo 2100<sup>®</sup>, VisualSonics, Toronto, Canada) to assess aortic valve function  
22 and aortic root dimensions. LV mass, volumes, and systolic function were assessed using the  
23 bi-plane area-length method, previously validated in our laboratory.<sup>2</sup> M-mode images were then  
24 acquired in order to measure systolic aortic valve orifice dimension as previously described.<sup>3</sup>  
25 Anatomical M-mode imaging was accomplished by redirection of the cursor superimposed on a  
26 short-axis 2D image of the aortic valve, as shown in Supplemental Figure IV. Color Doppler  
27 was used in a parasternal long-axis plane to determine the presence of aortic regurgitation.  
28 Echocardiographic severity of AR was graded by measuring length of the maximum diastolic  
29 regurgitant jet, and dividing by the end-diastolic long-axis length of the LV. Trace or mild AR  
30 was recorded when jet length was < 25% of LV length, moderate: 25 – 50%, severe: > 50%.

31 *Cardiac MRI.* Mice were deeply sedated with midazolam (8 mg/kg, subcutaneous) and  
32 morphine (4 mg/kg, subcutaneous), a regimen that produces only modest depression of heart  
33 rate and left ventricular contractility, and MRI was performed using an Innova<sup>®</sup> 4.7T instrument  
34 (Varian, Palo Alto, CA) as described previously.<sup>4</sup> The presence and qualitative severity of aortic  
35 regurgitation were assessed by observing dephasing of the blood signal in the left ventricular  
36 outflow tract during early diastole. Regurgitant fraction was then calculated as the difference  
37 between left and right ventricular (RV) stroke volumes divided by LV stroke volume.

38 *Invasive hemodynamic measurements.* Immediately prior to euthanasia, the peak aortic  
39 valve gradient was measured. Mice were anesthetized using ketamine/acepromazine (87.5/12.5  
40 mg/kg, intraperitoneal). A 1.4F microtransducer-tipped catheter (Millar, Houston, TX) was  
41 inserted into the right common carotid artery and advanced retrograde into the LV. Pressure  
42 was then continuously recorded as the catheter tip was pulled back into the ascending aorta.  
43 Aortic valve peak systolic gradient was calculated as the difference between peak LV pressure  
44 and peak aortic pressure. Aortic pulse pressure was calculated as the difference between  
45 systolic and diastolic aortic pressures.

46 *Valve histology.* Tissue was frozen in optimal cutting temperature compound (OCT,  
47 10.24% polyvinyl alcohol 4.26% polyethylene glycol 85.5% non-reactive ingredients). Sections,  
48 10-microns thick, were obtained from proximal, mid, and distal aortic valve from each mouse.  
49 Slides were stained with Alizarin Red, Masson's Trichrome or Picrosirius Red, or Oil Red-O to  
50 quantitate the amount of calcium, collagen and lipid, respectively, as described previously.<sup>1</sup>  
51 Movat's pentachrome stain was used to quantitate proteoglycan content in the aortic valve.

52 Immunofluorescence was used to quantitate levels of  $\alpha$ -SMA, TGF- $\beta$ 1, p-Smad2,  
53 osterix, osteocalcin, intact versican, cleaved versican, biglycan, p-HH3, and activated caspase-  
54 3. The method for discriminating between true immunofluorescence in the valve vs.  
55 autofluorescence in the valve annulus is shown in Supplemental Materials and Methods Figure  
56 IB below. Confirmatory quantitation of apoptosis in the aortic valve was performed using  
57 terminal deoxynucleotidyl transferase dUTP nick end labeling (TUNEL, In Situ Cell Death  
58 detection Kit<sup>®</sup>, Roche). The percentage of valve exhibiting positive staining was reported as “%  
59 positive”.

60 *Gene expression in aortic valve and proximal aorta.* Aortic roots from individual mice (6  
61 Control mice and 6 Wave mice, at  $12 \pm 1$  months of age) were frozen in OCT, after which the  
62 aortic valve was dissected free from supporting structures, under microscopic guidance, and  
63 transferred to Trizol reagent. RNA was prepared using RNeasy mini kit (Qiagen).  
64 Complementary DNA was generated using MMLV reverse transcriptase with random hexamers.  
65 ADAMTS1, ADAMTS5, biglycan, and versican mRNA levels were each measured in a well  
66 along with a  $\beta$ -actin reference standard, using qRT-PCR FAM and VIC fluors, respectively  
67 (TaqMan<sup>®</sup>, Integrated DNA Technologies, Coralville, IA). RNA from the ascending aorta was  
68 isolated at 6 months of age with Trizol reagent, followed by separation with RNeasy  
69 minicolumn(Quiagen). Smad3 and Smad7 mRNA levels were measured as described above.  
70 Sources for primers are shown in Supplemental Materials and Methods Table 1 below.

71 *Myocardial gene expression.* RNA was isolated with Trizol reagent from the left ventricle  
72 of 7-11 mice, and cDNA was generated using Superscript-III reverse transcriptase and random  
73 hexamers. Transcript levels were measured with SYBR Green and Bio-Rad CFX96 Real-Time  
74 system. Expression of genes of interest was normalized to 18S rRNA. The primer sequences  
75 utilized to interrogate myocardial gene expression are shown in Supplemental Materials and  
76 Methods Table 2 below.

77 *T-tubule imaging in myocardium.* The structure and organization of cardiomyocyte t-  
78 tubules were assessed using methods previously described in rats.<sup>5</sup> Briefly, whole hearts were  
79 removed, then perfused retrograde at room temperature for 30 minutes with Ca<sup>2+</sup>-free Tyrode's  
80 solution via Langendorff apparatus. The membrane-binding lipophilic marker, MM 4-64 (AAT  
81 BioQuest, CA) was added to perfusate for 30 minutes. T-tubules were imaged in intact hearts  
82 using a confocal microscope (LSM 510, Zeiss, Germany) at 63x magnification. Left ventricular  
83 T-tubule organization was reported as TT<sub>power</sub>, in each of 10 confocal micrographs from each  
84 mouse, using software designed for this purpose.<sup>5</sup> Lower values for TT<sub>power</sub> indicate disruption  
85 of T-tubule organization.

86 *Blood chemistries.* Total plasma cholesterol and inorganic phosphorus were measured  
87 with a spectrophotometer using the reagent sets (C7510 and P7516, respectively, Pointe  
88 Scientific, Inc., Canton, MI). Plasma calcium was determined spectrophotometrically using C503  
89 reagent set (Teco Diagnostics, Anaheim, CA).

90 *Statistical analysis.* All continuous variables are reported as mean  $\pm$  standard error.  
91 Group data for continuous variables were compared between Wave vs. age-matched Control  
92 mice, using Student's t-test. Presence or absence of a discrete condition (severe aortic  
93 stenosis or moderate/severe AR) was compared between groups using z-testing.<sup>6</sup> Data  
94 reporting the effect of pioglitazone treatment upon valve calcification, where  $N \leq 4$ , were first  
95 subject to Mann-Whitney Rank Sum testing in order to confirm that data conformed sufficiently  
96 to a normal distribution.<sup>6</sup> Statistical significance was set at  $p < 0.05$ , except where a group of  
97 data were utilized in two discrete comparison, in which case Bonferroni correction was utilized  
98 to set statistical significance at  $p < 0.025$ .

99  
100  
101  
102

103  
104  
105  
106  
107  
108  
109  
110  
111  
112  
113  
114  
115  
116  
117  
118  
119  
120  
121  
122  
123  
124  
125  
126  
127  
128  
129  
130  
131  
132  
133  
134  
135  
136  
137  
138  
139  
140  
141  
142  
143  
144  
145  
146  
147  
148  
149  
150  
151  
152

## References

1. Chu Y, Lund DD, Weiss RM, Brooks RM, Doshi H, Hajj GP, Sigmund CD, Heistad DD. Pioglitazone attenuates valvular calcification induced by hypercholesterolemia. *Arterioscler Thromb Vasc Biol.* 2013;33:523-532.
2. Hill, J.A., Mohsen, K, Kutschke, W., Davisson,R., Zimmerman, K., Wang, Z., Kerber, R.E., and Weiss, R.M.: Cardiac hypertrophy is not a required compensatory response to short-term pressure overload. *Circulation.* 2000;101:2854-2862.
3. Weiss RM, Lund DD, Chu Y, Brooks RM, Zimmerman KA, Accaoui RE, Davis MK, Hajj GP, Zimmerman MB, Heistad DD. Osteoprotegerin inhibits aortic valve calcification and preserves valve function in hypercholesterolemic mice. *PloS One.* 2013;8:e65201.
4. Berry CJ, Thedens DR, Light-McGroary K, Miller JD, Kutschke W, Zimmerman KA, Weiss RM. Effects of deep sedation or general anesthesia on cardiac function in mice undergoing cardiovascular magnetic resonance. *J Cardiovasc Magnet Reson.* 2009;11:16.
5. Wei S, Guo A, Chen B, Kutschke W, Xie YP, Zimmerman K, Weiss RM, Anderson ME, Cheng H, Song LS. T-tubule remodeling during transition from hypertrophy to heart failure. *Circ Res.* 2010;107:520-31.
6. Glantz SA. *Primer of Biostatistics.* 2012; McGraw-Hill, New York.

153 **Methods and Materials Table 1.** Primers and probes for assessment of gene expression in  
 154 the aortic valve and proximal aorta.  
 155

| 156 | <b><u>Gene</u></b> | <b><u>TaqMan Primers/probe</u></b> | <b><u>Source</u></b>         |
|-----|--------------------|------------------------------------|------------------------------|
| 157 | ADAMTS1            | Mm.PT.58.29991678/FAM              | Integrated DNA Technologies* |
| 158 | ADAMTS5            | Mm.PT.58.28649059/FAM              | Integrated DNA Technologies  |
| 159 | Biglycan           | Mm.PT.58.6381330/FAM               | Integrated DNA Technologies  |
| 160 | Versican           | Mm.PT.58.13796540/FAM              | Integrated DNA Technologies  |
| 161 | Smad3              | Mm.PT.56a.10139890/FAM             | Integrated DNA Technologies  |
| 162 | Smad7              | Mm.PT.56a.6640883/FAM              | Integrated DNA Technologies  |
| 163 | Beta-actin         | 4352341E/VIC                       | Applied Biosystems**         |
| 164 | GAPDH              | 4352339E/VIC                       | Applied Biosystems           |

165 \*Coralville, IA; \*\*Carlsbad, CA

166

167

168

169

170

171

172

173

174

175

176

177

178

179

180

181

182

183

184 **Materials and Methods Table 2.** Primer sequences for myocardial gene expression.

185 (18S-fwd) CTTTCGCTCTGGTCCGTCTT; (18S-rev) CTTTCGCTCTGGTCCGTCTT,

186 ( $\alpha$ -MyHC-fwd) CCTGTCCAGCAGAAAGAGC,187 ( $\alpha$ -MyHC-rev)CAGGCAAAGTCAAGCATTTCATATTTATTGTG,188 ( $\beta$ -MyHC-fwd) CAGGACACCAGCGCCCA,

189 (bMyHC-rev) CCCTTGGAGCTGGGTAGCAC,

190 (Anp-fwd) AGGAGAAGATGCCGGTAGAAGA,

191 (Anp-rev) GCTTCCTCAGTCTGCTCACTCA,

192 (Bnp-fwd) AAGGTGCTGTCCCAGATG,

193 (Bnp-rev) TTGGTCCTTCAAGAGCTGTC,

194 (Sk actin-fwd) CGACATCAGGAAGGACCTGTATGCC,

195 (Sk actin-rev) AGCCTCGTCGTACTIONCCTGCTTGG,

196 (Mcip1.4-fwd) AGCTCCCTGATTGCTTGTGT,

197 (Mcip1.4-rev) TGGAAGGTGGTGTCCCTTGT,

198 (Col1a1-fwd) AATGGCACGGCTGTGTGCGA,

199 (Col1a1-rev) AACGGGTCCCCTTGGGCCTT,

200 (Col3a1-fwd) TGGCACAGCAGTCCAACGTA,

201 (Col3a1-rev) TGACATGGTTCTGGCTTCCA,

202 (Serca-fwd) TGTAAGTGGCCAGATTGCTC,

203 (Serca-rev) CCTAAACAACCTGAAGTTAGG.

204

205
